# Supplementary material
Source: publisher site journal article supplement (https://www.dovepress.com/get_supplementary_file.php?f=385709.docx)
Supplement: Supplementary file 1 [file get_supplementary_file.php]

**Appendix A. Search strategies (Online supplement)**

**PubMed**

((((“college"[TIAB] OR "colleges"[TIAB] OR "university"[TIAB] OR "universities"[TIAB] OR "universities"[Mesh Terms] OR "higher education"[TIAB] OR "post secondary"[TIAB] OR "post-secondary"[TIAB]) **AND** ("student"[TIAB] OR "students"[TIAB] OR "students"[MeSH Terms] OR "undergraduate"[TIAB] OR "undergraduates"[TIAB] OR "graduate"[TIAB] OR "graduates"[TIAB] OR "freshman"[TIAB] OR "freshmen"[TIAB] OR "sophomore"[TIAB] OR "sophomores"[TIAB] OR "junior"[TIAB] OR "juniors"[TIAB] OR "senior"[TIAB] OR "seniors"[TIAB])) **AND** (“led”[TIAB] OR “run”[TIAB])) **AND** ("clinic"[TIAB] OR “clinics”[TIAB])) **OR** (“Student Run Clinic”[Mesh Terms] OR “Student Run Clinic”[TIAB] OR “Student Run Clinics”[TIAB]) **AND** (English[lang])

**Web of Science**

(College OR colleges OR university OR universities OR universities OR “higher education” OR “post secondary” OR post-secondary) **AND** (Student OR students OR undergraduate OR undergraduates OR graduate OR graduates OR freshman OR freshmen OR sophomore OR sophomores OR junior OR juniors OR senior OR seniors) **AND** ((led OR run) **AND** (clinic OR clinics))

**CINAHL**

( DE "UNIVERSITIES & colleges" OR TI ( college OR colleges OR university OR universities OR "higher education" OR “post secondary” OR post-secondary) OR AB ( college OR colleges OR university OR universities OR "higher education" OR “post secondary” OR post-secondary)) AND ( DE "UNDERGRADUATES" OR TI ( student OR students OR undergraduate OR undergraduates OR graduate OR graduates OR freshman OR freshmen OR sophomore OR sophomores OR junior OR juniors OR senior OR seniors ) OR AB ( student OR students OR undergraduate OR undergraduates OR graduate OR graduates OR freshman OR freshmen OR sophomore OR sophomores OR junior OR juniors OR senior OR seniors )) AND ((TI (led OR run) OR AB (led OR run) ) AND (TI (clinic OR clinics) OR AB (clinic OR clinics))
